# Supplementary material
Source: publisher site journal article supplement (https://www.dovepress.com/article/366605)
Supplement: Supplementary file 1 [file get_supplementary_file.php]

**Table S1. Clinical relevance of the circLRCH3/miR-233 axis in CRC.**

| Characteristic | No. Of  Parients（%） | CircLRCH3  expression | | *P  （df） | miR-233  expression | | *P  （df） |
| --- | --- | --- | --- | --- | --- | --- | --- |
|  | Low n=24(%) | High n=22(%) | Low n=22(%) | High n=24(%) |
| Age |  |  |  |  |  |  |  |
| <60 | 22（47.8） | 11（50.0） | 11（45.0） | 0.777  （1） | 12（50.0） | 10（45.5） | 0.382  （1） |
| ≥60 | 24（52.2） | 13（50.0） | 11（55.0） | 10（50.0） | 14（54.5） |
| Gender |  |  |  |  |  |  |  |
| Male | 21（45.6） | 10（45.5） | 11（45.0） | 0.571  （1） | 9（40.0） | 12（50.0） | 0.536  （1） |
| Female | 25（54.4） | 14（54.5） | 11（55.0） | 13（60.0） | 12（50.0） |
| Tumor size |  |  |  |  |  |  |  |
| <5 | 27（58.7） | 15（68.2） | 12（50.0） | 0.584  （1） | 15（65.0） | 12（54.5） | 0.211  （1） |
| ≥5 | 19（41.3） | 9（31.8） | 10（50.0） | 7（35.0） | 12（45.5） |
| Lymph node metastasis |  |  |  |  |  |  |  |
| With | 28（60.9） | 18（81.8） | 10（45.0） | 0.040  （1） | 9（40.0） | 19（86.4） | 0.008  （1） |
| Without | 18（39.1） | 6（18.2） | 12（55.0） | 13（60.0） | 5（13.6） |
| aTNM stage |  |  |  |  |  |  |  |
| Ⅰ | 11（23.9） | 2（8.3） | 9（40.9） | 0.018  （2） | 10（45.5） | 1（4.2） | 0.002  （2） |
| Ⅱ | 17（37.0） | 9（38.0） | 8（36.4） | 8（36.4） | 9（37.5） |
| Ⅲ | 18（39.1） | 13（54.7） | 5（22.7） | 4（18.1） | 14（58.3） |

aThere is no patients with TNM Ⅳ stage tumors

*P<0.05 indicates a significant relationship among the variables
